# Supplementary material for: Identification of new AAV vectors with enhanced blood–brain barrier penetration efficiency via organ-on-a-chip
Source: Royal Society of Chemistry journal article supplement (doi:10.1039/d4an00404c), 2024-01-01
Supplement: d4an00404c1.pdf [file d4an00404c1.pdf]

## Supporting Information

### Identification of new AAV vectors with enhanced blood-brain barrier penetration efficiency via organ-on-a-chip

Mengmeng Li, ‡<sup>a</sup> Yujian Zhong, ‡<sup>b</sup> Mingyang Zhu,<sup>a</sup> Chunjin Pang,<sup>a</sup> Lu Xiao,<sup>a</sup> Ye Bu,<sup>b</sup> Huapeng Li,<sup>b</sup> Yong Diao,<sup>a</sup> Chaoyong Yang<sup>c</sup> and Dan Liu<sup>\*a</sup>

<sup>a</sup>Engineering Research Centre of Molecular Medicine of Ministry of Education, Key Laboratory of Precision Medicine and Molecular Diagnosis of Fujian Universities, School of Medicine, Huaqiao University, Xiamen, Fujian, China

<sup>b</sup>PackGene Biotech, Guangzhou, Guangdong, China

<sup>c</sup>State Key Laboratory of Physical Chemistry of Solid Surfaces, the Key Laboratory of Chemical Biology of Fujian Province, Department of Chemical Biology, College of Chemistry and Chemical Engineering, Xiamen University, Xiamen, Fujian, China

#M.L. and Y.Z. contributed equally

\*Corresponding author email: liudan@hqu.edu.cn.

#### Table of Contents

**Fig. S1** Quantitative analysis of AAV fluorescence in the HA-1800 cell layer.

**Fig. S2** Bright field images of HA-1800 cells transfected with AAV-M6 or AAV.PHP.eB.

**Table S1.** Primers used in this study.

**Table S2.** Amino acid sequences of the AAV-M6 and AAV-M8 capsid proteins and heptapeptide insertions.

**Table S3.** Nucleotide sequences of heterologous peptides and AAV capsid protein mutants.

**Table S4.** Complete list of interacting residues and binding constant  $K_i$  from molecular docking simulation of human virus receptor proteins with heptapeptide insertion residues.

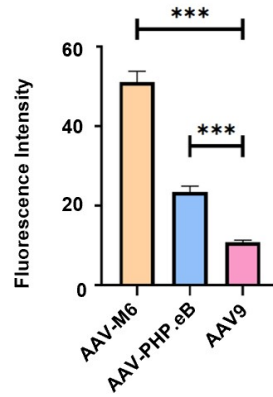

**Fig.S1** Quantitative analysis of AAV fluorescence in the HA-1800 cell layer.

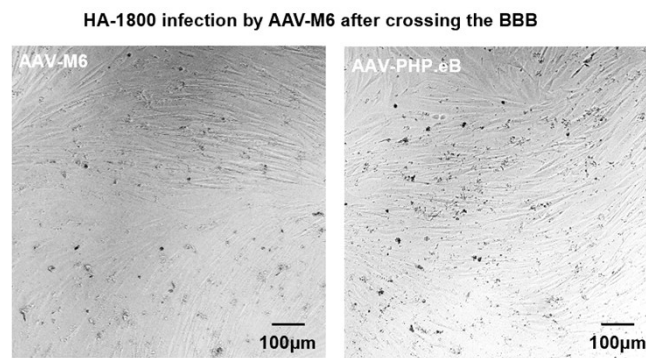

**Fig.S2** Bright field images of HA-1800 cells transfected with AAV-M6 or AAV.PHP.eB.

Scale bar: 100 µm.

**Table S1** Primers used in this study.

| Name of primers | The primer sequences (5'->3')                   |
|-----------------|-------------------------------------------------|
| Cap-F           | CATCTTTGAACAATAAATGATTTAAATCAGGTATG             |
| Cap-R           | AAAGTTCAACTGAAACGAATCAACC                       |
| AAV-M6-F        | CAAGCGATGCCTCGGACGCCGGTGCACAGGCGCAGACCGGCTG     |
| AAV-M6-R        | CGGCGTCCGAGGCATCGCTTGGGCACTCTGGTGGTTTGTGGCCAC   |
| AAV-M8-F        | CAAACGATGCCTAGGCATCCGCCGGCACAGGCGCAGACCGGCTG    |
| AAV-M8-R        | GCGGATGCCTAGGCATCGTTTGGGCACTCTGGTGGTTTGTGGCCACT |

**Table S2** Amino acid sequences of the AAV-M6 and AAV-M8 capsid proteins and heptapeptide insertions.

| AAV variant         | Amino acid sequences                                                                                                                                                                                                                                                                                                                                                                                                                                                                                                                                                                                                                                                                                                                                                                                                                                                                                                                                                                                                                                                                                                                                                                                                                                                                                                                                                                                                                                                                                                                                                                                                                                                                                                                                                                                                                                                                                                                                                                                                                                                                                                                                                                                                                                                                                                                                                                                                                                                                                                                                                                                                                                                                                                                                                                                                                                                                                                                                                                                                                                       |
|---------------------|------------------------------------------------------------------------------------------------------------------------------------------------------------------------------------------------------------------------------------------------------------------------------------------------------------------------------------------------------------------------------------------------------------------------------------------------------------------------------------------------------------------------------------------------------------------------------------------------------------------------------------------------------------------------------------------------------------------------------------------------------------------------------------------------------------------------------------------------------------------------------------------------------------------------------------------------------------------------------------------------------------------------------------------------------------------------------------------------------------------------------------------------------------------------------------------------------------------------------------------------------------------------------------------------------------------------------------------------------------------------------------------------------------------------------------------------------------------------------------------------------------------------------------------------------------------------------------------------------------------------------------------------------------------------------------------------------------------------------------------------------------------------------------------------------------------------------------------------------------------------------------------------------------------------------------------------------------------------------------------------------------------------------------------------------------------------------------------------------------------------------------------------------------------------------------------------------------------------------------------------------------------------------------------------------------------------------------------------------------------------------------------------------------------------------------------------------------------------------------------------------------------------------------------------------------------------------------------------------------------------------------------------------------------------------------------------------------------------------------------------------------------------------------------------------------------------------------------------------------------------------------------------------------------------------------------------------------------------------------------------------------------------------------------------------------|
| AAV-M6<br>(peptide) | AMPRTPG                                                                                                                                                                                                                                                                                                                                                                                                                                                                                                                                                                                                                                                                                                                                                                                                                                                                                                                                                                                                                                                                                                                                                                                                                                                                                                                                                                                                                                                                                                                                                                                                                                                                                                                                                                                                                                                                                                                                                                                                                                                                                                                                                                                                                                                                                                                                                                                                                                                                                                                                                                                                                                                                                                                                                                                                                                                                                                                                                                                                                                                    |
| AAV-M8<br>(peptide) | TMPRHPP                                                                                                                                                                                                                                                                                                                                                                                                                                                                                                                                                                                                                                                                                                                                                                                                                                                                                                                                                                                                                                                                                                                                                                                                                                                                                                                                                                                                                                                                                                                                                                                                                                                                                                                                                                                                                                                                                                                                                                                                                                                                                                                                                                                                                                                                                                                                                                                                                                                                                                                                                                                                                                                                                                                                                                                                                                                                                                                                                                                                                                                    |
| AAV-M6<br>(variant) | MAADGYLPDWLEDNLSEGIREW WALKPGAPQPKANQQHQDNARGLVLP<br>G<br>YKYLGPNGLDKGE PVNAADAAALEHDKAYDQQLKAGDNPYLKYNHADA<br>E<br>F<br>QERLKEDTSFGGNLGRAVFQAKKRLLLEPLGLVEEAAKTAPGKKRPVEQSPQ<br>E<br>P<br>DSSAGIGKSGAQPAAKRLNFGQTGDTEVPDPQPIGEPPAAPSGVGS<br>L<br>T<br>M<br>A<br>S<br>G<br>G<br>G<br>A<br>P<br>V<br>A<br>D<br>N<br>N<br>E<br>G<br>A<br>D<br>G<br>V<br>G<br>S<br>S<br>S<br>G<br>N<br>W<br>H<br>C<br>D<br>S<br>Q<br>W<br>L<br>G<br>D<br>R<br>V<br>I<br>T<br>T<br>S<br>T<br>R<br>T<br>W<br>A<br>L<br>P<br>T<br>Y<br>N<br>N<br>H<br>L<br>Y<br>K<br>Q<br>I<br>S<br>N<br>S<br>T<br>S<br>G<br>G<br>S<br>S<br>N<br>D<br>N<br>A<br>Y<br>F<br>G<br>Y<br>S<br>T<br>P<br>W<br>G<br>Y<br>F<br>D<br>F<br>N<br>R<br>F<br>H<br>C<br>H<br>F<br>S<br>P<br>R<br>D<br>W<br>Q<br>R<br>L<br>I<br>N<br>N<br>N<br>W<br>G<br>F<br>R<br>P<br>K<br>R<br>L<br>N<br>F<br>K<br>L<br>F<br>N<br>I<br>Q<br>V<br>K<br>E<br>V<br>T<br>D<br>N<br>N<br>G<br>V<br>K<br>T<br>I<br>A<br>N<br>N<br>L<br>T<br>S<br>T<br>V<br>Q<br>V<br>F<br>T<br>D<br>S<br>D<br>Y<br>Q<br>L<br>P<br>Y<br>V<br>L<br>G<br>S<br>A<br>H<br>E<br>G<br>L<br>P<br>P<br>P<br>A<br>D<br>V<br>F<br>M<br>I<br>P<br>Q<br>Y<br>G<br>Y<br>L<br>T<br>L<br>N<br>D<br>G<br>S<br>Q<br>A<br>V<br>G<br>R<br>S<br>S<br>F<br>Y<br>C<br>L<br>E<br>Y<br>F<br>P<br>S<br>Q<br>M<br>L<br>R<br>T<br>G<br>N<br>N<br>F<br>Q<br>F<br>S<br>Y<br>E<br>F<br>E<br>N<br>V<br>P<br>F<br>H<br>S<br>S<br>Y<br>A<br>H<br>S<br>Q<br>S<br>L<br>D<br>R<br>L<br>M<br>N<br>P<br>L<br>I<br>D<br>Q<br>Y<br>L<br>Y<br>Y<br>L<br>S<br>K<br>T<br>I<br>N<br>G<br>S<br>G<br>Q<br>N<br>Q<br>Q<br>T<br>L<br>K<br>F<br>S<br>V<br>A<br>G<br>P<br>S<br>N<br>M<br>A<br>V<br>Q<br>G<br>R<br>N<br>Y<br>I<br>P<br>G<br>P<br>S<br>Y<br>R<br>Q<br>Q<br>R<br>V<br>S<br>T<br>T<br>V<br>T<br>Q<br>N<br>N<br>N<br>S<br>E<br>F<br>A<br>W<br>P<br>G<br>A<br>S<br>S<br>W<br>A<br>L<br>N<br>G<br>R<br>N<br>S<br>L<br>M<br>N<br>P<br>G<br>P<br>A<br>M<br>A<br>S<br>H<br>K<br>E<br>G<br>E<br>D<br>R<br>F<br>F<br>L<br>S<br>G<br>S<br>L<br>I<br>F<br>G<br>K<br>Q<br>G<br>T<br>G<br>R<br>D<br>N<br>V<br>D<br>A<br>D<br>K<br>V<br>M<br>I<br>T<br>N<br>E<br>E<br>E<br>I<br>K<br>T<br>T<br>N<br>P<br>V<br>A<br>T<br>E<br>S<br>Y<br>G<br>Q<br>V<br>A<br>T<br>N<br>H<br>Q<br>S<br>A<br>Q<br>A<br>M<br>P<br>R<br>T<br>P<br>G<br>A<br>Q<br>A<br>Q<br>T<br>G<br>W<br>V<br>Q<br>N<br>Q<br>G<br>I<br>L<br>P<br>G<br>M<br>V<br>W<br>Q<br>D<br>R<br>D<br>V<br>Y<br>L<br>Q<br>G<br>P<br>I<br>W<br>A<br>K<br>I<br>P<br>H<br>T<br>D<br>G<br>N<br>F<br>H<br>P<br>S<br>P<br>L<br>M<br>G<br>G<br>F<br>G<br>M<br>K<br>H<br>P<br>P<br>P<br>Q<br>I<br>L<br>I<br>K<br>N<br>T<br>P<br>V<br>P<br>A<br>D<br>P<br>P<br>T<br>A<br>F<br>N<br>K<br>D<br>K<br>L<br>N<br>S<br>F<br>I<br>T<br>Q<br>Y<br>S<br>T<br>G<br>Q<br>V<br>S<br>V<br>E<br>I<br>E<br>W<br>E<br>L<br>Q<br>K<br>E<br>N<br>S<br>K<br>R<br>W<br>N<br>P<br>E<br>I<br>Q<br>Y<br>T<br>S<br>N<br>Y<br>Y<br>K<br>S<br>N<br>N<br>V<br>E<br>F<br>A<br>V<br>N<br>T<br>E<br>G<br>V<br>Y<br>S<br>E<br>P<br>R<br>P<br>I<br>G<br>T<br>R<br>Y<br>L<br>T<br>R<br>N<br>L<br>* |
| AAV-M8<br>(variant) | MAADGYLPDWLEDNLSEGIREW WALKPGAPQPKANQQHQDNARGLVLP<br>G<br>YKYLGPNGLDKGE PVNAADAAALEHDKAYDQQLKAGDNPYLKYNHADA<br>E<br>F<br>QERLKEDTSFGGNLGRAVFQAKKRLLLEPLGLVEEAAKTAPGKKRPVEQSPQ<br>E<br>P<br>DSSAGIGKSGAQPAAKRLNFGQTGDTEVPDPQPIGEPPAAPSGVGS<br>L<br>T<br>M<br>A<br>S<br>G<br>G<br>G<br>A<br>P<br>V<br>A<br>D<br>N<br>N<br>E<br>G<br>A<br>D<br>G<br>V<br>G<br>S<br>S<br>S<br>G<br>N<br>W<br>H<br>C<br>D<br>S<br>Q<br>W<br>L<br>G<br>D<br>R<br>V<br>I<br>T<br>T<br>S<br>T<br>R<br>T<br>W<br>A<br>L<br>P<br>T<br>Y<br>N<br>N<br>H<br>L<br>Y<br>K<br>Q<br>I<br>S<br>N<br>S<br>T<br>S<br>G<br>G<br>S<br>S<br>N<br>D<br>N<br>A<br>Y<br>F<br>G<br>Y<br>S<br>T<br>P<br>W<br>G<br>Y<br>F<br>D<br>F<br>N<br>R<br>F<br>H<br>C<br>H<br>F<br>S<br>P<br>R<br>D<br>W<br>Q<br>R<br>L<br>I<br>N<br>N<br>N<br>W<br>G<br>F<br>R<br>P<br>K<br>R<br>L<br>N<br>F<br>K<br>L<br>F<br>N<br>I<br>Q<br>V<br>K<br>E<br>V<br>T<br>D<br>N<br>N<br>G<br>V<br>K<br>T<br>I<br>A<br>N<br>N<br>L<br>T<br>S<br>T<br>V<br>Q<br>V<br>F<br>T<br>D<br>S<br>D<br>Y<br>Q<br>L<br>P<br>Y<br>V<br>L<br>G<br>S<br>A<br>H<br>E<br>G<br>L<br>P<br>P<br>P<br>A<br>D<br>V<br>F<br>M<br>I<br>P<br>Q<br>Y<br>G<br>Y<br>L<br>T<br>L<br>N<br>D<br>G<br>S<br>Q<br>A<br>V<br>G<br>R<br>S<br>S<br>F<br>Y<br>C<br>L<br>E<br>Y<br>F<br>P<br>S<br>Q<br>M<br>L<br>R<br>T<br>G<br>N<br>N<br>F<br>Q<br>F<br>S<br>Y<br>E<br>F<br>E<br>N<br>V<br>P<br>F<br>H<br>S<br>S<br>Y<br>A<br>H<br>S<br>Q<br>S<br>L<br>D<br>R<br>L<br>M<br>N<br>P<br>L<br>I<br>D<br>Q<br>Y<br>L<br>Y<br>Y<br>L<br>S<br>K<br>T<br>I<br>N<br>G<br>S<br>G<br>Q<br>N<br>Q<br>Q<br>T<br>L<br>K<br>F<br>S<br>V<br>A<br>G<br>P<br>S<br>N<br>M<br>A<br>V<br>Q<br>G<br>R<br>N<br>Y<br>I<br>P<br>G<br>P<br>S<br>Y<br>R<br>Q<br>Q<br>R<br>V<br>S<br>T<br>T<br>V<br>T<br>Q<br>N<br>N<br>N<br>S<br>E<br>F<br>A<br>W<br>P<br>G<br>A<br>S<br>S<br>W<br>A<br>L<br>N<br>G<br>R<br>N<br>S<br>L<br>M<br>N<br>P<br>G<br>P<br>A<br>M<br>A<br>S<br>H<br>K<br>E<br>G<br>E<br>D<br>R<br>F<br>F<br>L<br>S<br>G<br>S<br>L<br>I<br>F<br>G<br>K<br>Q<br>G<br>T<br>G<br>R<br>D<br>N<br>V<br>D<br>A<br>D<br>K<br>V<br>M<br>I<br>T<br>N<br>E<br>E<br>E<br>I<br>K<br>T<br>T<br>N<br>P<br>V<br>A<br>T<br>E<br>S<br>Y<br>G<br>Q<br>V<br>A<br>T<br>N<br>H<br>Q<br>S<br>A<br>Q<br>T<br>M<br>P<br>R<br>H<br>P<br>P<br>A<br>Q<br>A<br>Q<br>T<br>G<br>W<br>V<br>Q<br>N<br>Q<br>G<br>I<br>L<br>P<br>G<br>M<br>V<br>W<br>Q<br>D<br>R<br>D<br>V<br>Y<br>L<br>Q<br>G<br>P<br>I<br>W<br>A<br>K<br>I<br>P<br>H<br>T<br>D<br>G<br>N<br>F<br>H<br>P<br>S<br>P<br>L<br>M<br>G<br>G<br>F<br>G<br>M<br>K<br>H<br>P<br>P<br>P<br>Q<br>I<br>L<br>I<br>K<br>N<br>T<br>P<br>V<br>P<br>A<br>D<br>P<br>P<br>T<br>A<br>F<br>N<br>K<br>D<br>K<br>L<br>N<br>S<br>F<br>I<br>T<br>Q<br>Y<br>S<br>T<br>G<br>Q<br>V<br>S<br>V<br>E<br>I<br>E<br>W<br>E<br>L<br>Q<br>K<br>E<br>N<br>S<br>K<br>R<br>W<br>N<br>P<br>E<br>I<br>Q<br>Y<br>T<br>S<br>N<br>Y<br>Y<br>K<br>S<br>N<br>N<br>V<br>E<br>F<br>A<br>V<br>N<br>T<br>E<br>G<br>V<br>Y<br>S<br>E<br>P<br>R<br>P<br>I<br>G<br>T<br>R<br>Y<br>L<br>T<br>R<br>N<br>L<br>* |

**Table S3** Nucleotide sequences of heterologous peptides and AAV capsid protein mutants.

| AAV variant         | Nucleotide sequences                                                                                                                                                                                                                                                                                                                                                                                                                                                                                                                                                                                                                                                                                                                                                                                                                                                                                                                                                                                                                                                                                                                                                                                                                                                                                                                                                                                                                                                                                                                                                                                                                                                                                                                                                                                                                                                                                                                                                                                                                                             |
|---------------------|------------------------------------------------------------------------------------------------------------------------------------------------------------------------------------------------------------------------------------------------------------------------------------------------------------------------------------------------------------------------------------------------------------------------------------------------------------------------------------------------------------------------------------------------------------------------------------------------------------------------------------------------------------------------------------------------------------------------------------------------------------------------------------------------------------------------------------------------------------------------------------------------------------------------------------------------------------------------------------------------------------------------------------------------------------------------------------------------------------------------------------------------------------------------------------------------------------------------------------------------------------------------------------------------------------------------------------------------------------------------------------------------------------------------------------------------------------------------------------------------------------------------------------------------------------------------------------------------------------------------------------------------------------------------------------------------------------------------------------------------------------------------------------------------------------------------------------------------------------------------------------------------------------------------------------------------------------------------------------------------------------------------------------------------------------------|
| AAV-M6<br>(peptide) | GCGATGCCTCGGACGCCGGT                                                                                                                                                                                                                                                                                                                                                                                                                                                                                                                                                                                                                                                                                                                                                                                                                                                                                                                                                                                                                                                                                                                                                                                                                                                                                                                                                                                                                                                                                                                                                                                                                                                                                                                                                                                                                                                                                                                                                                                                                                             |
| AAV-M8<br>(peptide) | ACGATGCCTAGGCATCCGCCG                                                                                                                                                                                                                                                                                                                                                                                                                                                                                                                                                                                                                                                                                                                                                                                                                                                                                                                                                                                                                                                                                                                                                                                                                                                                                                                                                                                                                                                                                                                                                                                                                                                                                                                                                                                                                                                                                                                                                                                                                                            |
| AAV-M6<br>(variant) | <p>ATGGCTGCCGATGGTTATCTTCCAGATTGGCTCGAGGACAACCTTAGT<br/> GAAGGAATTCGCGAGTGGTGGGCTTTGAAACCTGGAGCCCCTCAACCC<br/> AAGGCAAATCAACAACATCAAGACAACGCTCGAGGTCTTGTGCTTCCG<br/> GGTTACAAATACCTTGGACCCGGCAACGGACTCGACAAGGGGGAGCC<br/> GGTCAACGCAGCAGACGCGGCGGCCCTCGAGCACGACAAGGCCTACG<br/> ACCAGCAGCTCAAGGCCGGAGACAACCCGTACCTCAAGTACAACCACG<br/> CCGACGCCGAGTTCAGGAGCGGCTCAAAGAAGATACGTCTTTTGGG<br/> GGCAACCTCGGGCGAGCAGTCTTCCAGGCCAAAAGAGGCTTCTTGAA<br/> CCTCTTGGTCTGGTTGAGGAAGCGGCTAAGACGGCTCCTGGAAAGAA<br/> GAGGCCTGTAGAGCAGTCTCCTCAGGAACCGGACTCCTCCGCGGGTAT<br/> TGGCAAATCGGGTGACAGCCCGCTAAAAGAGACTCAATTCGGTCA<br/> GACTGGCGACACAGAGTCAGTCCCAGACCCTCAACCAATCGGAGAACC<br/> TCCCGCAGCCCCCTCAGGTGTGGGATCTTTACAATGGCTTCAGGTGG<br/> TGGCGCACCAAGTGGCAGACAATAACGAAGGTGCCGATGGAGTGGGTA<br/> GTTCTCGGGAAATTGGCATTGCGATTCCAATGGCTGGGGGACAGA<br/> GTCATCACCACCAGCACCCGAACCTGGGCCCTGCCACCTACAACAATC<br/> ACCTCTACAAGCAAATCTCCAACAGCACATCTGGAGGATCTTCAAATGA<br/> CAACGCCTACTTCGGCTACAGCACCCCTGGGGGTATTTTGACTTCAAC<br/> AGATTCCACTGCCACTTCTCACCACGTGACTGGCAGCGACTCATCAACA<br/> ACAACCTGGGGATTCCGGCCTAAGCGACTCAACTCAAGCTCTTCAACAT<br/> TCAGGTCAAAGAGGTTACGGACAACAATGGAGTCAAGACCATCGCCA<br/> ATAACCTTACCAGCACGGTCCAGGTCTTACGGACTCAGACTATCAGCT<br/> CCCGTACGTGCTCGGGTCGGCTCACGAGGGTGCCTCCCGCCGTTCC<br/> AGCGGACGTTTTTCATGATTCTCAGTACGGGTATCTGACGCTTAATGAT<br/> GGAAGCCAGGCCGTGGGTCGTTTCGTCCTTTTACTGCCTGGAATATTTCC<br/> CGTCGCAAATGCTAAGAACGGGTAACAACCTCCAGTTCAGCTACGAGT<br/> TTGAGAACGTACCTTTCCATAGCAGCTACGCTCACAGCCAAAGCCTGG<br/> ACCGACTAATGAATCCACTCATCGACCAATACTTGTAATCTCTCTCAA<br/> GACTATTAACGGTTCTGGACAGAATCAACAAACGCTAAAATTCAAGTGT<br/> GGCCGGACCCAGCAACATGGCTGTCCAGGGAAGAACTACATACCTG<br/> GACCCAGCTACCGACAACAACGTGTCTCAACCACTGTGACTCAAACA<br/> ACAACAGCGAATTTGCTTGGCCTGGAGCTTCTTCTTGGGCTCTCAATGG<br/> ACGTAATAGCTTGATGAATCCTGGACCTGCTATGGCCAGCCACAAAGA<br/> AGGAGAGGACCGTTTCTTCTTTGTCTGGATCTTTAATTTTTGGCAA<br/> CAAGGAACTGGAAGAGACAACGTGGATGCGGACAAAGTCATGATAAC<br/> CAACGAAGAAGAAATTAATACTACTAACCCTGGTAGCAACGGAGTCCTA<br/> TGGACAAGTGGCCACAACCACCAGAGTGCCCAAGCGATGCCTCGGA</p> |

---

CGCCGGGTGCACAGGCGCAGACCGGCTGGGTTCAAACCAAGGAATA  
CTTCCGGGTATGGTTTGGCAGGACAGAGATGTGTACCTGCAAGGACCC  
ATTTGGGCCAAAATTCTCACACGGACGGCAACTTTCACCCCTTCTCCGC  
TGATGGGAGGGTTTGAATGAAGCACCCGCCTCCTCAGATCCTCATCA  
AAAACACACCTGTACCTGCGGATCCTCCAACGGCCTTCAACAAGGACA  
AGCTGAACTCTTTCATCACCCAGTATTCTACTGGCCAAGTCAGCGTGA  
GATCGAGTGGGAGCTGCAGAAGGAAAACAGCAAGCGCTGGAACCCG  
GAGATCCAGTACACTTCCAATTACAAGTCTAATAATGTTGAATTTG  
CTGTTAATACTGAAGGTGTATATAGTGAACCCCGCCCCATTGGCACCA  
GATACCTGACTCGTAATCTGTAA

---

AAV-M8  
(variant)

ATGGCTGCCGATGGTTATCTTCCAGATTGGCTCGAGGACAACCTTAGT  
GAAGGAATTCGCGAGTGGTGGGCTTTGAAACCTGGAGCCCCTCAACCC  
AAGGCAAATCAACAACATCAAGACAACGCTCGAGGTCTTGTGCTTCCG  
GGTTACAAATACCTTGGACCCGGCAACGGACTCGACAAGGGGGAGCC  
GGTCAACGCAGCAGACGCGGCGGCCCTCGAGCACGACAAGGCCTACG  
ACCAGCAGCTCAAGGCCGGAGACAACCCGTACCTCAAGTACAACCAGC  
CCGACGCCGAGTTCAGGAGCGGCTCAAAGAAGATACGTCTTTTGGG  
GGCAACCTCGGGCGAGCAGTCTTCCAGGCCAAAAGAGGCTTCTTGAA  
CCTCTTGGTCTGGTTGAGGAAGCGGCTAAGACGGCTCCTGGAAAGAA  
GAGGCCTGTAGAGCAGTCTCCTCAGGAACCGGACTCCTCCGCGGGTAT  
TGGCAAATCGGGTGCACAGCCCGCTAAAAGAGACTCAATTTCCGGTCA  
GACTGGCGACACAGAGTCAGTCCCAGACCCTCAACCAATCGGAGAACC  
TCCCGCAGCCCCCTCAGGTGTGGGATCTCTTACAATGGCTTCAGGTGG  
TGGCGCACCAGTGGCAGACAATAACGAAGGTGCCGATGGAGTGGGTA  
GTTCTCGGGAAATTGGCATTGCGATTCCAATGGCTGGGGGACAGA  
GTCATCACCACCAGCACCCGAACCTGGGCCCTGCCACCTACAACAATC  
ACCTCTACAAGCAAATCTCCAACAGCACATCTGGAGGATCTTCAAATGA  
CAACGCCTACTTCGGCTACAGCACCCCTGGGGGTATTTTGACTTCAAC  
AGATTCCACTGCCACTTCTACCACGTGACTGGCAGCGACTCATCAACA  
ACAACCTGGGGATTCCGGCCTAAGCGACTCAACTCAAGCTCTTCAACAT  
TCAGGTCAAAGAGGTTACGGACAACAATGGAGTCAAGACCATCGCCA  
ATAACCTTACCAGCACGGTCCAGGTCTTACGGACTCAGACTATCAGCT  
CCCGTACGTGCTCGGGTCCGGCTCACGAGGGGCTGCCTCCCGCCGTTCC  
AGCGGACGTTTTTCATGATTCTCAGTACGGGTATCTGACGCTTAAATGAT  
GGAAGCCAGGCCGTGGGTCGTTCTGCTCTTTTACTGCCTGGAATATTTCC  
CGTCGCAAATGCTAAGAACGGGTAACAACCTTCCAGTTCAGCTACGAGT  
TTGAGAACGTACCTTTCCATAGCAGCTACGCTCACAGCCAAAGCCTGG  
ACCGACTAATGAATCCACTCATCGACCAATACTTGTACTATCTCTCAA  
GACTATTAACGGTTCTGGACAGAATCAACAAACGCTAAAATTCAGTGT  
GGCCGACCCAGCAACATGGCTGTCCAGGGAAGAACTACATACCTG  
GACCCAGCTACCGACAACAACGTGTCTCAACCACTGTGACTCAAACA  
ACAACAGCGAATTTGCTTGGCCTGGAGCTTCTTCTTGGGCTCTCAATGG  
ACGTAATAGCTTGATGAATCCTGGACCTGCTATGGCCAGCCACAAGA  
AGGAGAGGACCGTTTCTTCTTGTCTGGATCTTTAATTTTTGGCAA

---

CAAGGAACTGGAAGAGACAACGTGGATGCGGACAAAGTCATGATAAC  
 CAACGAAGAAGAAATTAATACTACTAACCCGGTAGCAACGGAGTCCTA  
 TGGACAAGTGGCCACAAACCACCAGAGTGCCCAAACGATGCCTAGGC  
ATCCGCCGGCACAGGCGCAGACCCGGCTGGGTTCAAACCAAGGAATA  
 CTTCCGGGTATGGTTTGGCAGGACAGAGATGTGTACCTGCAAGGACCC  
 ATTTGGGCCAAAATTCCTCACACGGACGGCAACTTTCACCCTTCTCCGC  
 TGATGGGAGGGTTTGAATGAAGCACCCGCCTCCTCAGATCCTCATCA  
 AAAACACACCTGTACCTGCGGATCCTCCAACGGCCTTCAACAAGGACA  
 AGCTGAACTCTTTCATCACCCAGTATTCTACTGGCCAAAGTCAGCGTGGA  
 GATCGAGTGGGAGCTGCAGAAGGAAAACAGCAAGCGCTGGAACCCG  
 GAGATCCAGTACACTTCCAATAATTACAAGTCTAATAATGTTGAATTTG  
 CTGTTAATACTGAAGGTGTATATAGTGAACCCCGCCCCATTGGCACCA  
 GATACCTGACTCGTAATCTGTAA

**Table S4** Complete list of interacting residues and binding constant  $K_i$  from molecular docking simulation of human virus receptor proteins with heptapeptide insertion residues.

|       | Protein | Peptide | Binding Constant $K_i$ |
|-------|---------|---------|------------------------|
| LY6D  | THR-104 | THR-5   | 0.96 $\mu$ M           |
|       | THR-102 | THR-5   |                        |
|       | HIS97   | ARG4    |                        |
|       | THR47   | ARG4    |                        |
|       | GLN85   | ARG4    |                        |
|       | LYS95   | ARG4    |                        |
| LY6E  | ARG108  | THR-6   | 13.52 $\mu$ M          |
|       | SER-101 | ARG-5   |                        |
| M6PR  | ASP-129 | ARG-4   | 0.12 $\mu$ M           |
|       | GLU-127 | ARG-4   |                        |
|       | THR-101 | ARG-4   |                        |
|       | ARG105  | ARG-4   |                        |
|       | THR-85  | ARG-4   |                        |
|       | GLY-98  | ALA-1   |                        |
| MELTF | ASN141  | GLY-7   | 23.52 $\mu$ M          |
|       | THR-137 | THR-5   |                        |
|       | TYR-210 | PRO-3   |                        |
| HBEFG | ARG-142 | GLY-7   | 45.10 $\mu$ M          |
